1 **Genome Assembly and Population Resequencing Reveal the**  
2 **Geographical Divergence of ‘Shanmei’ (*Rubus corchorifolius*)**

3  
4 **Yinqing Yang**<sup>1,#</sup>, **Kang Zhang**<sup>1,#</sup>, **Ya Xiao**<sup>1,2</sup>, **Lingkui Zhang**<sup>1</sup>, **Yile Huang**<sup>1</sup>,  
5 **Xing Li**<sup>1</sup>, **Shumin Chen**<sup>1</sup>, **Yansong Peng**<sup>4</sup>, **Shuhua Yang**<sup>1,\*</sup>, **Yongbo Liu**<sup>3,\*</sup>,  
6 **Feng Cheng**<sup>1,\*</sup>

7  
8 <sup>1</sup> *Institute of Vegetables and Flowers, Chinese Academy of Agricultural Sciences, Key Laboratory of*  
9 *Biology and Genetic Improvement of Horticultural Crops of the Ministry of Agriculture, Sino-Dutch*  
10 *Joint Laboratory of Horticultural Genomics, Beijing 10008, China*

11 <sup>2</sup> *Biotechnology Research Center, Xiangxi Academy of Agricultural Sciences, Jishou 416000, China*

12 <sup>3</sup> *State Environmental Protection Key Laboratory of Regional Eco-process and Function Assessment,*  
13 *Chinese Research Academy of Environmental Sciences, Beijing 100012, China*

14 <sup>4</sup> *Lushan Botanical Garden, Chinese Academy of Sciences, Lushan 332900, China*

15  
16 \* Corresponding authors.

17 E-mail: [chengfeng@caas.cn](mailto:chengfeng@caas.cn) (Cheng F), [liuyb@caas.org.cn](mailto:liuyb@caas.org.cn) (Liu Y), [yangshuhua@caas.cn](mailto:yangshuhua@caas.cn) (Yang S).

18 # Equal contribution.

19  
20 Runing title:

21 **Genome Assembly and Population divergence of Shanmei**

22  
23 Total word count for the main body of the text: 4880

24 Word count for Introduction, Materials and Methods, Results, Discussion, and  
25 Acknowledgements are 686, 1474, 2191, 472, and 57

26 Total number of references: 80

27 Total number of figures: 5

28 Color figures: Figures 1 to 5

29 Total number of tables: 1

30 Number of supplemental tables: 12

31 Number of supplemental figures: 14

32

33

34 **Abstract:**

35 ***Rubus corchorifolius*** ('**Shanmei**' or mountain berry,  $2n=14$ ) is widely distributed in  
36 China, and its fruit has high nutritional and medicinal values. Here, we report a  
37 high-quality chromosome-scale **genome assembly** of Shanmei, with a size of 215.69  
38 Mb and encompassing 26,696 genes. Genome comparisons among Rosaceae species  
39 show that Shanmei and Fupenzi (*Rubus chingii* Hu) are most closely related, and then  
40 is blackberry (*Rubus occidentalis*). Further **resequencing** of 101 samples of Shanmei  
41 collected from four regions in provinces of Yunnan, Hunan, Jiangxi, and Sichuan in  
42 South China reveals that the Hunan population of Shanmei possesses the highest  
43 diversity and may represent the relatively more ancestral population. Moreover, the  
44 Yunnan population undergoes strong selection based on nucleotide diversity, linkage  
45 disequilibrium, and the historical effective population size analyses. Furthermore,  
46 genes from candidate genomic regions that show strong **divergence** are significantly  
47 enriched in flavonoid biosynthesis and plant hormone signal transduction, indicating  
48 the genetic basis of adaptation of Shanmei to the local environments. The high-quality  
49 genome sequences and the variome dataset of Shanmei provide valuable resources for  
50 breeding applications and for elucidating the **genome evolution** and ecological  
51 adaptation of *Rubus* species.

52

53 **Keywords:** *Rubus corchorifolius*; Genome assembly; Resequencing; Divergence;  
54 Genome evolution.

55

56

## 57 **Introduction**

58 *Rubus corchorifolius*, also named ‘Shanmei’, belongs to the Rosaceae family. *Rubus*  
59 is a large genus consisting of approximately 750 species, most of which are perennial  
60 shrubs and biennial vines [1]. Species from *Rubus* constitute important components of  
61 the ground layer of hillsides, valleys, and large forest canopy gaps, providing a host of  
62 ecological benefits, including soil stabilization, reduced soil nutrient loss, as well as  
63 food for wildlife. The wide distribution of *Rubus* species is accompanied by rich  
64 diversity both in terms of stress adaptation and organ development, and thus *Rubus*  
65 has great potential for agricultural utilization [2]. There are 201 species and 98  
66 varieties of *Rubus* distributed in various regions of China, which provide important  
67 resources for the exploration of the biological diversity of the genus. At present, only  
68 a few species in the genus *Rubus*, including blackberry, dewberry, and arctic raspberry,  
69 have been domesticated and utilized in breeding programs [3]. Some of them, such as  
70 blackberry, have been developed as important crops with great economic value [4].

71 Shanmei, one of the most important *Rubus* species with many desirable  
72 horticultural traits, is widely distributed in China. There are rich diversities and  
73 significant differences among Shanmei population from different geographic regions,  
74 including in characters associated with environmental adaptation, population size, as  
75 well as flowering, single fruit weight, and fruit size. The fruit of Shanmei is popular  
76 for its unique flavor and nutrients, such as high amounts of anthocyanins, superoxide  
77 dismutase (SOD), vitamin C, and essential amino acids [5, 6]. Shanmei fruit has been  
78 processed into food products as jam, juice, wine, and ice cream, and is becoming  
79 increasingly popular among consumers [7]. The terpenoids extracted from Shanmei  
80 leaves can suppress the development of cancer cells by inducing tumor cell  
81 differentiation and apoptosis [8]. Considering the important economic and medicinal  
82 values of Shanmei, it is of practical significance to explore and utilize its wild  
83 resources.

84 The genome is an essential resource for studying the traits and gene functions of  
85 species [9]. Thus far, several high-quality genomes of Rosaceae species have been

86 released, including *Pyrus communis* (pear) [10], *Malus domestica* (apple) [11],  
87 *Prunus persica* (peach) [11], *Prunus mume* (plum) [12], *Prunus armeniaca* (apricot)  
88 [13], *Fragaria vesca* (strawberry) [14], *Rosa chinensis* (rose) [15], *Rubus occidentalis*  
89 (blackberry) [4], and *Rubus chingii* Hu (Fupenzi) [16]. Comparative genomics  
90 analysis revealed the evolutionary relationships among Rosaceae species and  
91 reconstructed a hypothetical ancestry. Using the data of chloroplast genome, previous  
92 work showed that Shanmei was located at the Rubeae clade of the Rosaceae family,  
93 and is closest to *Rubus rufus* [17]. Genomic data also provide important genetic  
94 resources for the identification of important agronomic traits including flavor, scent,  
95 nutritional value, flower color, and flowering times [10, 13, 14]. Blackberry and  
96 Fupenzi, which are closely related to Shanmei, are the two members of *Rubus* with a  
97 chromosome-level genome [4, 16]. The gene duplication of chalcone synthase (*CHS*),  
98 the first committed enzyme in flavonoid biosynthesis, was found to be positively  
99 correlated with trait domestication in blackberry based on genomic resources [4]. In  
100 addition, transcriptome data were used to analyze gene expression patterns during  
101 blackberry fruit ripening. These findings contributed to our understanding of the  
102 biology and breeding application of blackberry [4]. For Fupenzi, the genome analysis  
103 revealed that there was a tandem gene cluster in chromosome 02 that regulated the  
104 biosynthetic pathway of hydrolyzable tannins [16]. However, as there are no available  
105 genomic resources for Shanmei, the investigations of the genetic mechanisms  
106 underlying the favorable traits or the exploitations on population resource of this  
107 potential species as a fast-growing economical horticultural crop is hindered.

108 In this study, we generated the first chromosome-scale assembly of the Shanmei  
109 genome and re-sequenced 101 Shanmei samples collected from four different  
110 geographical regions in China. Comparative genomics analysis revealed the expanded  
111 gene families that allow Shanmei to occupy its special ecological niche. The  
112 population analysis found that the Hunan population is the relatively ancestral group,  
113 while the Yunnan population underwent strong selection. The high-quality genome  
114 and population variome dataset of Shanmei not only provided insights into its  
115 evolution and geographical divergence but also provided a foundation for the

116 breeding utilization of Shanmei.

## 117 **Results**

### 118 **Pseudo-chromosome construction of the Shanmei genome**

119 We sequenced and assembled the genome of Shanmei (**Figure 1A**) using combined  
120 sequencing data from Oxford Nanopore Technologies (ONT), Illumina HiSeq, and  
121 high-throughput chromosome conformation capture (Hi-C). The genome was  
122 estimated to be 187.82 Mb in size with a heterozygosity ratio of 1.82% based on  
123 21-kmer counting, showing that it is highly heterozygous (Figure S1). A total of 36.87  
124 Gb (~180 ×) Nanopore long reads were generated and assembled into 221 contigs  
125 (Table S1). The size of the assembly was 330 Mb, with a contig N50 of 2.49 Mb. It  
126 was speculated that the significantly larger size of the assembly compared to the  
127 estimate was caused by the introduction of the heterozygous contigs, considering the  
128 high heterozygosity ratio. Therefore, redundant contigs were then identified and  
129 filtered out using Purge Haplotigs (version 1.2.3) [18], and only 120 contigs (215.69  
130 Mb) were retained for further analysis. A total of 43.56 Gb (~220 ×) Hi-C data were  
131 further used to link the contigs into scaffolds. Consequently, 10 scaffolds were  
132 obtained with an N50 of 29.50 Mb. The seven largest scaffolds comprised 117 contigs,  
133 which accounted for 99.35% (214.29 Mb) of the assembled genome and were  
134 corresponding to the seven pseudo-chromosomes of Shanmei (Figure 1B, Figure S2;  
135 Table S2). Furthermore, the telomere sequences were identified in the ends of the  
136 seven chromosomes (Figure S2), which supported the high quality of the genome  
137 assembly of Shanmei. Additionally, Benchmarking Universal Single-Copy Ortholog  
138 (BUSCO) analysis showed that 94.7% of the BUSCO genes were successfully  
139 identified in the Shanmei genome (Table 1).

140 We employed an integrated pipeline to annotate the genome by combining *de*  
141 *novo* prediction, homology search, and RNA-seq data alignment (Methods). A total of  
142 26,696 protein-coding genes were predicted in the Shanmei genome (Table S3). The  
143 high gene prediction quality was supported by the fact that 1976 (93.1%) of the

144 BUSCO genes were found in the Shanmei gene set. In addition, repeat annotation  
145 revealed that approximately 35.85% (77.33 Mb) of the genome was composed of  
146 repetitive elements, comparable to that of Fupenzi [16]. The predominant type of  
147 transposable elements (TEs) was long terminal repeat (LTR) retrotransposons,  
148 accounting for 11.26% of the genome (Table S4).

#### 149 **Expanded gene families in flavonoid biosynthesis and stress resistance**

150 Rosaceae is an economically important family composed of 2800 species among 95  
151 genera, including the specialty fruit crops apple, almond, and blackberry. In order to  
152 infer the phylogenetic position of Shanmei in Rosaceae, we obtained 932 single-copy  
153 genes and constructed a phylogenetic tree for 10 Rosaceae species with grape as the  
154 outgroup (**Figure 2A**). The tree showed that Shanmei and Fupenzi were most closely  
155 related. Each genomic region in Shanmei was found to be orthologous to a single  
156 region in each of Fupenzi, blackberry, and strawberry based on genomic synteny  
157 analysis, suggesting that no lineage-specific genome duplication occurred in Shanmei  
158 after the common  $\gamma$  hexaploidization event [4] (Figure 1C and D, Figure S3 and 5). In  
159 addition, a large translocation on chromosome 6 between Shanmei and blackberry  
160 was identified (Figure 1C). To verify the accuracy of the assembly results, we  
161 re-adjusted the scaffolding orders of the contigs in chromosome 6 to follow those in  
162 blackberry and found that the resultant Hi-C heatmap exhibited clear mis-connections  
163 (Figure S4), suggesting an authentic translocation between Shanmei and blackberry,  
164 which may be associated with the divergence of the two species. Meanwhile, four  
165 smaller inversions on chromosome 1 and 4 were found between Shanmei and Fupenzi  
166 (Figure S5). These inversions were also verified based on Hi-C heatmap (Figure S6  
167 and 7).

168 Subsequently, we determined the expansion and contraction of orthologous gene  
169 families using CAFÉ (version 4.2.1) [19] software. It was found that a total of 1440  
170 and 2834 gene families underwent expansion and contraction, respectively in  
171 Shanmei. Kyoto Encyclopedia of Genes and Genomes (KEGG) enrichment analyses  
172 revealed that the expanded gene families mainly participated in phenylalanine

173 metabolism, flavonoid biosynthesis, brassinosteroid biosynthesis, and biosynthesis of  
174 secondary metabolites (corrected  $P$ -value  $\leq 0.05$ ; Figure S8A; Table S5). In  
175 contrast, the contracted gene families were mainly associated with monoterpenoid  
176 biosynthesis, alpha-linolenic acid metabolism, and nitrogen metabolism (corrected  
177  $P$ -value  $\leq 0.05$ ; Figure S8B; Table S6). Furthermore, some significantly expanded  
178 genes were closely related to stress resistance, such as *HSP90*, *HSP70*, *BRI1*, *BIN2*,  
179 and *RPM1* (Figure 2B; Table S7). Multiple studies have reported that the expanded  
180 families in different plants may contribute to abiotic and biotic stress tolerance.  
181 Overexpression of *OsHsp90* can enhance cell viability and heat tolerance in rice under  
182 heat stress [20]. *BRI1*, as a signal receptor in the brassinosteroid signal transduction  
183 pathway, plays an important role in plant development and disease resistance [21].  
184 *RPM1* is a resistance gene that improves the resistance to root-knot nematodes in wild  
185 *myrobalan plum* [22]. In summary, the expansion of these genes may contribute to the  
186 environmental adaptability of Shanmei in the wild.

### 187 **Genomic variation response to morphology**

188 Shanmei is a low shrub, which is typical in the genus *Rubus*. Lignin is an important  
189 factor associated with plant height differences [23]. We identified the key genes for  
190 lignin biosynthesis in Shanmei, based on the homologous genes reported in  
191 *Arabidopsis thaliana* (*Arabidopsis*). We found that the gene copy numbers of *CAD* ( $P$   
192 value: 0.036) and *COMT* ( $P$  value: 0.047) were increased significantly in trees (Figure  
193 S9; Table S9). There are nine copies of *CAD* in Shanmei and 12 in strawberry,  
194 comparing to 24 and 18 in trees of pear and peach, respectively. It is known that the  
195 decreased expression dosage of *CAD* leads to sterility and dwarfing in *Arabidopsis*  
196 [24]. The increased copy number of *CAD* genes in trees may contribute to their  
197 activity of lignin biosynthesis. Meanwhile, the number of *COMT* in shrubs (eight in  
198 Shanmei) was more than that in herbs (five in strawberry), and both were less than  
199 that in trees (15 in pear; 14 in peach) (Figure S9C). *COMT* is one of the important  
200 enzymes controlling lignin monomer production in plant cell wall biosynthesis, and  
201 decreased expression of *COMT* resulted in decreased lignin content [25]. Furthermore,

202 we compared the expression of genes related to lignin biosynthesis in the stem organ  
203 of three representative species, i.e., strawberry, Shanmei, and pear, and found that the  
204 expression level of lignin biosynthesis-related genes showed a positive association  
205 with the heights of species that were compared (Figure S9D), which further supported  
206 the dosage effect of these lignin biosynthesis-related genes in Rosaceae.

207 Anthocyanins are abundant in Shanmei and have essential functions in stress  
208 resistance and fruit coloring. We identified the key genes for anthocyanin biosynthesis  
209 in Shanmei genome based on anthocyanin-related gene pathways reported in  
210 Arabidopsis and blackberry [26, 27] (Methods; Table S8). Among them, *MYB10* is the  
211 main regulator in anthocyanin biosynthesis. By comparing the functional domain of  
212 MYB10 from 10 species of Rosaceae, we identified two conservative motifs (R2 and  
213 R3 as shown in Figure S10A) in MYB10, and found that the amino acids of alanine  
214 (A) in R3 motif was substituted by serine (S) in Shanmei, which is shared only by red  
215 raspberry and blackberry [27]. In addition, we found a novel substitution in which the  
216 aspartic acid (D, acidic amino acid) located in the R3 motif was replaced by the  
217 asparagine (N, neutral amino acid) only in blackberry (Figure S10B).

### 218 **Population structure of Shanmei**

219 To elucidate the population structure of Shanmei, we collected 101 samples from the  
220 provinces of Jiangxi (21), Hunan (25), Yunnan (25), and Sichuan (30) in South China  
221 (Methods), which is the main distribution area of Shanmei. We resequenced these  
222 samples at an average depth of 34-fold coverage (**Figure 3A**; Table S10). The  
223 resultant average mapping rate was 91.7% (Table S10). Single nucleotide  
224 polymorphisms (SNPs) were identified with the Genome Analysis Toolkit (GATK)  
225 [28]. After filtering, a total of 758,978 SNPs were retained for further analysis. The  
226 SNPs were evenly distributed across the chromosomes (Figure 1d; Table S11). A total  
227 of 18.98% and 10.56% of the SNPs were located in gene-proximal (2 kb upstream or  
228 downstream of a coding sequence) and in coding regions, respectively. Moreover, a  
229 total of 38,468 (5.07%) SNPs resulted in non-synonymous sequence changes, among  
230 which 837 (0.11%) SNPs disrupted the coding sequence (premature stop codon).



231 In order to further explore the phylogenetic relationships among the 101 samples,  
232 we constructed a phylogenetic tree based on the maximum-likelihood (ML) method  
233 and found that the accessions were clustered into four clades, which exactly  
234 corresponded to four geographical regions (Figure 3B). Principal component analysis  
235 (PCA) also revealed four clusters, which was consistent with the phylogenetic result  
236 (Figure 3C). We found that the Jiangxi and Hunan groups remained closely associated.  
237 The genetic clustering results were further confirmed by the genetic structure analyses  
238 (Figure 3D). When  $K=4$ , the same four groups were observed, indicating the  
239 distinguishable divergence among populations from different geographical regions.  
240 These data showed that the Hunan population is more diversified and may represent  
241 the relatively ancestral group of Shanmei.

#### 242 **Flavonoid and phytohormone pathways contributed to the adaptation of** 243 **Shanmei**

244 On the basis of the phylogenetic relationships and population structure, we further  
245 investigated the population-level heterozygosity among Shanmei populations. We  
246 found that the Yunnan group had a lower level of heterozygosity than groups of  
247 Jiangxi, Sichuan, and Hunan (**Figure 4A**; Table S12). Consistently, the linkage  
248 disequilibrium (LD, indicated by  $r^2$ ) decay rate was highest in the Yunnan group  
249 followed by the Sichuan, Jiangxi, and Hunan groups (Figure 4B). We then calculated  
250 the nucleotide diversities ( $\pi$ ) for the four groups. The Yunnan group had the lowest  
251 nucleotide diversity ( $\pi = 6.0 \times 10^{-4}$ ) compared with groups of Sichuan ( $\pi = 7.5 \times 10^{-4}$ ),  
252 Hunan ( $\pi = 8.1 \times 10^{-4}$ ), and Jiangxi ( $\pi = 8.5 \times 10^{-4}$ ) (Figure 4C). In addition, the  
253 historical effective population size analysis showed that the population size of Yunnan  
254 decreased significantly in the recent period compared to the other groups (Figure 4D).  
255 In short, these results suggested that the Yunnan group, which is distributed at the  
256 high altitude region, underwent the greatest pressure of selection among the four  
257 groups.

258 To reveal the genetic basis of the strong selection in the Yunnan group, the Hunan,  
259 Jiangxi, and Sichuan groups were used as controls to determine the candidate

260 genomic regions under selection through genome scanning with a 50-kb sliding  
261 window. We found 97 regions that displayed increased levels of differentiation  
262 between the Yunnan group and Hunan group (YN\_HN) and a significant reduction in  
263 nucleotide diversity in Yunnan ( $F_{ST} > 0.29$ ;  $\log_2(\pi_{HU}/\pi_{YN}) > 1.59$ ; both exceeding  
264 the top 5% threshold). Similarly, a total of 94 regions between the Jiangxi group and  
265 Yunnan group (JX\_YN), and 57 regions between the Sichuan group and Yunnan  
266 group (SC\_YN) were identified (Figure 4E). In total, we identified 749, 679, and 435  
267 genes in the candidate regions of the HN\_YN, JX\_YN, and SC\_YN comparisons,  
268 respectively.

269 It was found that the flavonoid biosynthesis-related genes were strongly enriched  
270 in genes under selection (Figure 4F, Figure S9 and 11). By comparing the nucleotide  
271 diversity of genes in the flavonoid biosynthesis pathway (**Figure 5A**), we found that  
272 the Yunnan group had the lowest polymorphism ( $\pi = 6.1 \times 10^{-4}$ ), indicating strong  
273 selection of these genes in the Yunnan group (Figure 5B). Because the genome-wide  
274 diversity of Yunnan group is lower than that of the other groups, we further compared  
275 the diversity of flavonoid biosynthesis genes with all genes as the genome background.  
276 The results showed that the  $\pi$  values of flavonoid biosynthesis genes were lower than  
277 that of the genome background in Yunnan group, which was different to that in the  
278 other groups (Figure 5B). Moreover, genes of flavonol synthase (*FLS*) and  
279 anthocyanidin synthase (*ANS*) displayed remarkable differences between the Yunnan  
280 group and the other groups (Figure 5C). *ANS* is a key component in anthocyanin  
281 biosynthesis, which not only is responsible for the coloring of plants [29], but also  
282 responds to changes in the external environment [30]. A high abundance of *ANS*  
283 enhanced the resistance of bell pepper to low temperature and ultraviolet-B radiation  
284 [31]. *FLS* exhibits great potential for regulating plant growth and development, and  
285 enhancing plant resistance under abiotic stresses. For example, the increase in *CitFLS*  
286 expression promoted fruit ripening during citrus fruit development [32]. *FLS* also can  
287 help plants to acclimate to salinity and ultraviolet-B [33]. The purifying selection of  
288 *FLS* and *ANS* in the Yunnan group indicated their contribution to the local  
289 environmental adaptability of Shanmei in Yunnan.

290        Additionally, some genes related to the mitogen-activated protein kinase (MAPK)  
291 signaling pathway and the plant hormone signal transduction pathway were also  
292 found to be enriched in these genes under selection. MAPK plays an important role in  
293 the plant response to stress. In our study, *MKK2*, *ANP1*, and *MAPKKK17\_18*, key  
294 genes in the MAPK signaling pathway [34], were located in regions under selection.  
295 Plant hormones are the endogenous messenger molecules that precisely mediate plant  
296 growth and development, as well as responses to various biotic and abiotic stresses.  
297 Phytohormones play important roles in various biology activities of plants. Genes on  
298 the phytohormone signaling pathways were under selection in the Yunnan group, such  
299 as genes involved in the abscisic acid (ABA) signaling (*PYL*, *PP2C*, and *NCED*) and  
300 auxin signaling (*IAA*, *ARF*, and *SAUR*). These results highlighted the importance of  
301 the MAPK signaling pathway and plant hormone signal transduction in the  
302 environmental adaptability of Shanmei.

### 303 **Discussion**

304 Shanmei is a widely distributed wild species that possesses many important  
305 characteristics, such as strong adaptability and high medicinal efficacy, thus providing  
306 promising genetic materials for breeding. In our study, we assembled a  
307 chromosome-scale genome of Shanmei and analyzed its population features. The  
308 assembled genome and variome datasets serve as valuable resources for future  
309 evolutionary and molecular breeding studies of Shanmei.

310        The strong environmental adaptability of Shanmei makes it a pioneer plant for  
311 reclaiming wasteland primarily due to its high reproduction efficiency and barren  
312 tolerance. The assembled genome provides important information on the genetic  
313 mechanisms underlying its adaptability. Interspecies comparative genomic analysis  
314 revealed that *HSPs*, *RPM1*, *BIN2*, and *BRI1* underwent significant expansion in gene  
315 copy number in Shanmei genome. The *HSP* genes can enhance the heat stress ability  
316 of plants [20], while the *RPM1* gene can reduce the damage caused by pathogens [22].  
317 The expression of *BIN2* and *BRI1* that involved in brassinosteroid signal transduction

318 was significantly increased under heat, salt, heavy metal, and drought stress [36, 37].  
319 Furthermore, we found that the copy number of the key genes related to lignin  
320 biosynthesis, such as *CAD*, *CCR*, *COMT*, and *CCoAOMT*, increased generally in a  
321 gradient fashion in herbs, shrubs, and trees. These genes are associated with plant  
322 height. For example, the *CAD* and *CCR* mutations displayed a severe dwarfing  
323 phenotype [24], and the *COMT* and *CCoAOMT* double mutation resulted in reduced  
324 lignin and dwarfing in *Medicago truncatula* [38]. Therefore, we speculated that the  
325 increase in gene copy number may lead to an increase in expression dosage, which in  
326 turn leads to differences in phenotypes.

327 The resequencing data further contributed to our understanding of the population  
328 divergence and environmental adaptability of Shanmei. Selective sweep analysis  
329 focusing on the Yunnan group, which is from the high altitude region and was  
330 identified to be under relatively stronger selection compared with the other groups,  
331 determined that flavonoid biosynthesis-related genes, as well as genes functioning in  
332 plant hormone signal transduction, were enriched in the genomic regions under  
333 selection. This indicated that these pathways were crucial to the adaptation of  
334 Shanmei to its environment. Generally, flavonoids protect plants against UV, high  
335 temperatures, and pathogens [39, 40]. Furthermore, in our study, we found that the  
336 Yunnan population exhibited strong selection for genes of *FLS* and *ANS*, which  
337 catalyze the biosynthesis of anthocyanins and flavanols, respectively. *FLS* and *ANS*  
338 enhance plant resistance to high temperatures and ultraviolet light [41, 42].  
339 Additionally, key genes related to ABA were identified to be under selection in  
340 Shanmei, including genes *PYL*, *PP2C*, and *NCED* that are essential for ABA  
341 biosynthesis during salt and drought stress [43, 44]. Taken together, these results  
342 suggested that flavonoid biosynthesis and plant hormone signal transduction pathways  
343 are important for enhancing the environmental adaptability of Shanmei and serve as  
344 potential genetic targets for the further cultivation selection of *Rubus* species.

## 345 **Materials and methods**

### 346 **Materials, sampling, and sequencing**

347 Shanmei seedlings were collected in Jiangxi province of China (115.98°E, 29.68°N)  
348 and transplanted into the greenhouse of the Chinese Academy of Agricultural Science.  
349 The genomic DNA was isolated from the tender leaves using the DNeasy plant mini  
350 kit (Qiagen 69104, Dusseldorf, Germany). The Nanopore library was build according  
351 to the manufacturer's protocol, and genomic sequencing was performed to generate  
352 long reads using the Oxford Nanopore PromethION sequencer platform. For Illumina  
353 sequencing, a paired-end library was constructed with an insert size of 350 bp and  
354 sequenced using the Illumina HiSeq platform, which was used to estimate genomic  
355 characteristics and sequence polish. Details of the sequencing are provided in Table  
356 S1.

357       Considering that Shanmei is mainly distributed south to a line from the northeast  
358 to the southwest of China (<https://www.cvh.ac.cn>), samples from four representative  
359 regions were collected. They are the Hunan population (114.43°E, 27.29°N,  
360 1000–1300 m) that is located at the central region of South China, the Jiangxi  
361 population (115.98°E, 29.68°N, 1100–1300 m) that is located in the east of South  
362 China, the Sichuan population (103.22°E, 29.35°N, 1400–1600 m) that is located at  
363 the west of South China, and the Yunnan population (104.43°E, 23.15°N, 1700–1900  
364 m) that is located at Southeast China. The Yunnan Shanmei samples distribute in the  
365 high altitude region, serving as a subpopulation under specific environmental  
366 selection. Two micrograms of DNA per sample was extracted from the fresh leaves  
367 using a standard cetyl trimethylammonium bromide (CTAB) extraction protocol.  
368 Sequencing libraries were constructed using a Truseq Nano DNA HT Sample  
369 Preparation Kit (Illumina USA) following the manufacturer's instructions. These  
370 libraries were sequenced by the Illumina NovaSeq platform, and 150 bp paired-end  
371 reads were generated with insert sizes around 350 bp.

### 372 **Genome assembly**

373 Jellyfish (version 2.3.0) [45] was used to calculate the k-mer depth distribution with  
374 the Illumina short reads, and GenomeScope (version 1.0) [46] was used to estimate  
375 the genome size and heterozygosity. Then, NextDenovo (version 2.0,

376 <https://github.com/Nextomics/NextDenovo>) was used to assemble the Nanopore reads  
377 into contigs. The racon (version 1.3.2) [47] and pilon (version 1.2.3) [48] were further  
378 used to polish the original contigs with the Nanopore and Illumina reads, each was  
379 run for three rounds. Finally, Purge Haplotigs (version 1.2.3) [18] was used to remove  
380 heterozygous segments to generate the final contigs. BUSCO was used to assess the  
381 completeness of the genome with the embryophyta\_odb10 database [49]. Default  
382 parameters were used if not specified.

### 383 **Hi-C library construction and scaffolding**

384 Fresh leaves from the same Shanmei plant that used for genome sequencing were  
385 collected for Hi-C sequencing. The HindIII restriction enzyme was used during the  
386 library preparation procedure. The high-quality library was sequenced using the  
387 Illumina HiSeq platform. The Hi-C reads were filtered by removing adapter  
388 sequences and low-quality reads using Trimmomatic (version 0.39) [50]. The retained  
389 Hi-C reads were aligned to the contigs using Juicer (version 1.5,  
390 <https://github.com/aidenlab/juicer>) to obtain the interaction matrix. ALLHIC (version  
391 0.9.8) [51] was used to group, order, and orientate the contigs. Finally, the linking  
392 results were manually curated to correct mis-joins and mis-assemblies based on the  
393 Hi-C heatmap using JuicerBox (version 1.11.08) [52].

### 394 **Repetitive element prediction**

395 LTR\_retriever (version 2.7) [53] and RepeatModeler (version 1.0.4) [54] were used to  
396 construct the *de novo* repeat libraries. Then, cd-hit software was used to merge the  
397 resultant libraries into a non-redundant repeat library (parameters: -c 0.8 -as 0.8 -M 0).  
398 Finally, RepeatMasker (version open-4.0.7) [54] was applied to identify and mask the  
399 repeat sequences in the Shanmei genome based on the library.

### 400 **Protein-coding gene prediction and annotation**

401 An integrated approach was applied to predict the protein-coding genes by merging  
402 the results from homology-based searches, mRNA-seq assisted prediction, and *ab*  
403 *initio* prediction. For annotation of homologs, genome sequences of eight species

404 (grape, strawberry, blackberry, apple, peach, pear, apricot, and Chinese rose) were  
405 collected from the Genome Database for Rosaceae and were then aligned to Shanmei  
406 genome to identify the homologous genes using Exonerate (version 2.4.7) [55]. The  
407 *ab initio* gene prediction of Shanmei genome was performed using Genemark  
408 (version 4.61\_lic) [56] and AUGUSTUS (version 3.3.3) [57]. The RNA-seq data from  
409 three tissues (roots, stems, and leaves) were used for transcriptome prediction.  
410 Specifically, Hisat2 (version 2.2.1) [58] and Stringtie (version 2.1.4) [59] were used to  
411 map RNA-seq reads to the assembled genome and to assemble the alignments into  
412 transcripts, respectively. TransDecoder (version 5.5.0,  
413 <https://github.com/TransDecoder/TransDecoder>) was used to identify the potential  
414 coding regions in the resultant transcripts. Meanwhile, the RNA-seq reads were *de*  
415 *novo* assembled into transcripts by Trinity (version 2.11.0) [60] using the  
416 genome-guided mode, and PASA (version 2.3.1) [61] was used for gene prediction  
417 from these transcripts. Finally, EvidenceModeler (version 1.1.1) [62] was used to  
418 integrate all gene prediction datasets to generate the final gene set of Shanmei. The  
419 predicted protein-coding genes were aligned to the KEGG databases and annotated  
420 using KEGG Automatic Annotation Server (KAAS) [63] with an E-value threshold of  
421  $1 \times 10^{-5}$ .

#### 422 **Gene expansion and contraction**

423 To identify homologous genes among Shanmei and other plants, the protein sequences  
424 of Shanmei were aligned to those of other species (grape, strawberry, blackberry,  
425 apple, peach, pear, and Chinese rose) using OrthoFinder (version 2.2.7) [64] with an  
426 E-value threshold of  $1 \times 10^{-5}$ . The protein sequences of single-copy genes were  
427 aligned using MUSCLE (version 3.8.31) [65], and the phylogenetic tree was  
428 constructed using RAxML (version 8.2.10) [66] with the maximum likelihood  
429 algorithm. CAFE (version 4.2.1) [19] was used to identify the expanded and  
430 contracted gene families for each species. Default parameters were used if not  
431 specified.

#### 432 **SNP calling and filtering**

433 The paired-end re-sequencing reads were filtered with Trimmomatic (version 0.38)  
434 [50]. BWA-MEM (version 0.7.17) [67] was used to align the reads of each sample to  
435 the assembled genome. Then, the sequence Alignment (SAM) files were sorted and  
436 indexed using samtools (version 1.6) [68]. The GATK (version 1.7.0) [28] genome  
437 analysis toolkit was employed to identify variants. In order to obtain high-confidence  
438 variants, raw variants were filtered using VCFtools (version 0.1.16) [69]. The filtering  
439 criteria were as follows: (1) only SNPs with consensus quality (minQ)  $\geq 30$  and  
440 average SNP depth (minDP)  $\geq 10$  were retained; (2) the multiallelic sites were filtered  
441 out; (3) only SNPs with minor allele frequencies (MAFs)  $\geq 0.01$  and a minor allele  
442 count (mac)  $\geq 3$  were kept; and (4) SNPs were further filtered based on linkage  
443 disequilibrium (LD) with the parameter: --indep-pairwise 100 kb 1 0.5. Finally,  
444 759,241 high-quality SNPs were retained for subsequent analyses. The SNP  
445 annotation was performed using ANNOVAR (version 2010Feb15) [70], and SNPs  
446 were categorized into intergenic, upstream, downstream region, intron, and exon types  
447 based on their relative locations compared with the annotated genes. The SNPs  
448 located in coding exons were further separated into synonymous and nonsynonymous  
449 SNPs.

#### 450 **Phylogenetic and population structure**

451 PHYLIP (version 3.696, <https://evolution.genetics.washington.edu/phylip.html>) was  
452 employed to infer the phylogenies of the Shanmei population based on the  
453 neighbor-joining algorithm, and MEGA7 (version 7.0) [71] was used to visualize the  
454 phylogenetic tree. A PCA of autosomal SNPs was performed using SNPRelate  
455 (version 1.28.0) [72]. Structure analysis was performed using ADMIXTURE (version  
456 1.3.0) [73]. The K-values were set from two to seven to estimate the population  
457 structure (with the parameters: -geno 0.05 -maf 0.0037 -hwe 0.0001). Finally, the  
458 smallest cross-validation (CV) value appeared at  $K=4$  (Figure S8).

#### 459 **Inference of the historical population effective size**

460 PSMC (version 0.6.5-r67) [74] was used to estimate the historical effective population



461 size based on the whole-genome resequencing data of the four Shanmei groups. The  
462 mutation rate was assumed as  $\mu = 1.9 \times 10^{-9}$  mutations  $\times$  bp<sup>-1</sup>  $\times$  generation<sup>-1</sup>, which  
463 was estimated by r8s (version 1.8.1) [75]. One generation was considered as one year.  
464 Finally, the script psmc\_plot.pl from the PSMC package was used to visualize the  
465 results.

#### 466 **Genome-wide selection signal scanning**

467 To identify genomic regions under selection in Yunnan Shanmei group comparing to  
468 the other groups, values of fixation statistic ( $F_{ST}$ ) and  $\pi$  were calculated using the  
469 VCFtools (version 0.1.16) [69] with a 50 kb nonoverlapping sliding window. Putative  
470 selection targets with the top 5% of  $\log_2$  ratios for both  $\pi$  and  $F_{ST}$  were identified in  
471 Yunnan group comparing to each of the other groups. The genes from the genomic  
472 regions under selection were analyzed with in-house scripts.

#### 473 **Identification of key genes in anthocyanin and lignin biosynthesis**

474 The genes involved in anthocyanin and lignin biosynthesis reported in Arabidopsis  
475 were collected as references. The BLASTP and SynOrths (version 1.5) [76] tools were  
476 used to search the Shanmei genome for homologous genes with an E-value  $1 \times 10^{-20}$ .  
477 Genes supported by both tools were extracted for subsequent analysis using an  
478 in-house script. The genes were further confirmed by functional domains prediction in  
479 PfamScan (version 1.5, <https://www.ebi.ac.uk/Tools/pfa/pfamscan/>). The gene *MYB10*  
480 was identified based on *RiMYB10* (GenBank ID: 161878916) from red raspberry  
481 (*Rubus idaeus*) using mummer (version 4.0.0) [77]. The phylogenetic trees were build  
482 using MEGA7 [71] with the neighbor-joining algorithm.

#### 483 **Data availability**

484 The genome assembly data has been deposited in the Genome Warehouse [78], the  
485 resequencing data has been deposited in the Genome Sequence Archive [79], in the  
486 National Genomics Data Center [80], China National Center for Bioinformation /  
487 Beijing Institute of Genomics, Chinese Academy of Sciences, under the accession

488 numbers GWHBDNY00000000 and CRA003829, respectively. These datasets are  
489 publicly accessible at <https://bigd.big.ac.cn/gsa>.

#### 490 **CRedit author statement**

491 **Yinqing Yang:** Formal analysis, Investigation, Writing - original draft. **Kang Zhang:**  
492 Investigation, Software, Writing - review & editing. **Ya Xiao:** Validation. **Lingkui**  
493 **Zhang:** Methodology. **Yile Huang:** Methodology. **Xing Li:** Investigation. **Shumin**  
494 **Chen:** Investigation. **Yansong Peng:** Resources. **Shuhua Yang:** Conceptualization,  
495 Resources. **Yongbo Liu:** Conceptualization, Resources. **Feng Cheng:**  
496 Conceptualization, Supervision, Writing - review & editing, Funding acquisition. All  
497 authors read and approved the final manuscript.

#### 498 **Competing interests**

499 The authors have declared no competing interests.

#### 500 **Acknowledgments**

501 This work was supported by the grants from the Biodiversity Survey and Assessment  
502 Project of the Ministry of Ecology and Environment, China (No. 2019HJ2096001006),  
503 and the Science and Technology Innovation Program of the Chinese Academy of  
504 Agricultural Sciences, and the Key Laboratory of Biology and Genetic Improvement  
505 of Horticultural Crops, Ministry of Agriculture, People's Republic of China.

506

#### 507 **ORCID**

508 0000-0002-9698-1661 (Yinqing Yang)

509 0000-0002-3699-2860 (Kang Zhang)

510 0000-0002-3181-4977 (Ya Xiao)

511 0000-0002-7472-2642 (Lingkui Zhang)

512 0000-0002-3975-8148 (Yile Huang)

513 0000-0003-2836-0959 (Xing Li)

514 0000-0001-8890-9144 (Shumin Chen)

515 0000-0001-8685-1495 (Yansong Peng)

516 0000-0002-5948-1756 (Shuhua Yang)

517 0000-0003-1618-8813 (Yongbo Liu)

518 0000-0003-2982-9675 (Feng Cheng)

519

520

## 521 **References**

- 522 [1] Thompson MM. Chromosome numbers of *Rubus* species at the National Clonal Germplasm  
523 Repository. HortScience 1995;30:1447-52.
- 524 [2] Kuijper DPJ, Croomsigt JPGM, Churski M, Adam B, Jędrzejewska B, Jędrzejewski W. Do ungulates  
525 preferentially feed in forest gaps in European temperate forest? Forest Ecology and Management  
526 2009;258:1528-35.
- 527 [3] Miyashita T, Kunitake H, Yotsukura N, Hoshino Y. Assessment of genetic relationships among  
528 cultivated and wild *Rubus* accessions using AFLP markers. Scientia Horticulturae 2015;193:165-73.
- 529 [4] VanBuren R, Bryant D, Bushakra JM, Vining KJ, Edger PP, Rowley ER, et al. The genome of black  
530 raspberry (*Rubus occidentalis*). The Plant Journal 2016;87:535-47.
- 531 [5] Zhang C, Hao Y-J. Advances in Genomic, Transcriptomic, and Metabolomic Analyses of Fruit  
532 Quality in Fruit Crops. Horticultural Plant Journal 2020;6:361-71.
- 533 [6] Schulz M, Chim JF. Nutritional and bioactive value of *Rubus* berries. Food Bioscience  
534 2019;31:100438.
- 535 [7] Yang Y-N, Zheng F-P, Yu A-N, Sun B-G. Changes of the free and bound volatile compounds in  
536 *Rubus corchorifolius* L. f. fruit during ripening. Food Chemistry 2019;287:232-40.
- 537 [8] Chen X, Wu X, Ouyang W, Gu M, Gao Z, Song M, et al. Novel ent-Kaurane Diterpenoid from  
538 *Rubus corchorifolius* L. f. Inhibits Human Colon Cancer Cell Growth via Inducing Cell Cycle Arrest  
539 and Apoptosis. Journal of Agricultural and Food Chemistry 2017;65:1566-73.
- 540 [9] Zhang L. Advance of Horticultural Plant Genomes. Horticultural Plant Journal 2019;5:229-30.
- 541 [10] Wu J, Wang Z, Shi Z, Zhang S, Ming R, Zhu S, et al. The genome of the pear (*Pyrus*  
542 *bretschneideri* Rehd.). Genome research 2013;23:396-408.
- 543 [11] Velasco R, Zharkikh A, Affourtit J, Dhingra A, Cestaro A, Kalyanaraman A, et al. The genome of  
544 the domesticated apple (*Malus × domestica* Borkh.). Nature Genetics 2010;42:833-9.
- 545 [12] Zhang Q, Chen W, Sun L, Zhao F, Huang B, Yang W, et al. The genome of *Prunus mume*. Nature  
546 communications 2012;3:1318.
- 547 [13] Jiang F, Zhang J, Wang S, Yang L, Luo Y, Gao S, et al. The apricot (*Prunus armeniaca* L.) genome  
548 elucidates Rosaceae evolution and beta-carotenoid synthesis. Horticulture Research 2019;6:128.
- 549 [14] Shulaev V, Sargent DJ, Crowhurst RN, Mockler TC, Folkerts O, Delcher AL, et al. The genome of  
550 woodland strawberry (*Fragaria vesca*). Nature Genetics 2011;43:109-16.
- 551 [15] Raymond O, Gouzy J, Just J, Badouin H, Verdenaud M, Lemainque A, et al. The *Rosa* genome  
552 provides new insights into the domestication of modern roses. Nature Genetics 2018;50:772-7.
- 553 [16] Wang L, Lei T, Han G, Yue J, Zhang X, Yang Q, et al. The chromosome-scale reference genome of  
554 *Rubus chingii* Hu provides insight into the biosynthetic pathway of hydrolyzable tannins. The Plant  
555 Journal 2021;107:1466-77.
- 556 [17] Huang W, Qiao F, Guo W, Wu W. Characterization of the complete chloroplast genome sequence  
557 of *Rubus rufus* Focke (Rosaceae). Mitochondrial DNA B Resour 2021;6:3093-4.
- 558 [18] Roach MJ, Schmidt SA, Borneman AR. Purge Haplotigs: allelic contig reassignment for third-gen  
559 diploid genome assemblies. BMC Bioinformatics 2018;19:460.
- 560 [19] Han MV, Thomas GWC, Lugo-Martinez J, Hahn MW. Estimating Gene Gain and Loss Rates in  
561 the Presence of Error in Genome Assembly and Annotation Using CAFE 3. Molecular Biology and  
562 Evolution 2013;30:1987-97.
- 563 [20] Zhang H, Li L, Ye T, Chen R, Gao X, Xu Z. Molecular characterization, expression pattern and

- 564 function analysis of the *OsHSP90* family in rice. *Biotechnology & Biotechnological Equipment*  
565 2016;30:669-76.
- 566 [21] Ali SS, Gunupuru LR, Kumar GBS, Khan M, Scofield S, Nicholson P, et al. Plant disease  
567 resistance is augmented in uzu barley lines modified in the brassinosteroid receptor BRI1. *BMC Plant*  
568 *Biology* 2014;14:227.
- 569 [22] Fang L, Long Z, Fangquan X, Kang L, Jianfang H. Characterization of the *psorPMP1* gene for  
570 resistance to root-knot nematodes in wild myrobalan plum (*Prunus sogdiana*). *African Journal of*  
571 *Biotechnology* 2011;10:12859-67.
- 572 [23] Liu Q, Luo L, Zheng L. Lignins: Biosynthesis and Biological Functions in Plants. *International*  
573 *journal of molecular sciences* 2018;19:335.
- 574 [24] Thévenin J, Pollet B, Letarne C, Saulnier L, Gissot L, Maia-Grondard A, et al. The simultaneous  
575 repression of CCR and CAD, two enzymes of the lignin biosynthetic pathway, results in sterility and  
576 dwarfism in *Arabidopsis thaliana*. *Molecular plant* 2011;4:70-82.
- 577 [25] Lu N, Ma W, Han D, Liu Y, Wang Z, Wang N, et al. Genome-wide analysis of the *Catalpa bungei*  
578 caffeic acid O-methyltransferase (*COMT*) gene family: identification and expression profiles in normal,  
579 tension, and opposite wood. *PeerJ* 2019;7:e6520-e.
- 580 [26] Teng S, Keurentjes J, Bentsink Ln, Koornneef M, Smeekens S. Sucrose-Specific Induction of  
581 Anthocyanin Biosynthesis in *Arabidopsis* Requires the MYB75/PAP1 Gene. *Plant Physiology*  
582 2005;139:1840-52.
- 583 [27] Chen Q, Yu H, Tang H, Wang X. Identification and expression analysis of genes involved in  
584 anthocyanin and proanthocyanidin biosynthesis in the fruit of blackberry. *Scientia Horticulturae*  
585 2012;141:61-8.
- 586 [28] McKenna A, Hanna M, Banks E, Sivachenko A, Cibulskis K, Kernytzky A, et al. The Genome  
587 Analysis Toolkit: a MapReduce framework for analyzing next-generation DNA sequencing data.  
588 *Genome research* 2010;20:1297-303.
- 589 [29] Donoso A, Rivas C, Zamorano A, Peña Á, Handford M, Aros D. Understanding *Alstroemeria*  
590 *pallida* Flower Colour: Links between Phenotype, Anthocyanins and Gene Expression. *Plants (Basel,*  
591 *Switzerland)* 2020;10:55.
- 592 [30] Hasegawa H, Fukasawa-Akada T, Okuno T, Niizeki M, Suzuki M. Anthocyanin accumulation and  
593 related gene expression in Japanese parsley (*Oenanthe stolonifera*, DC.) induced by low temperature.  
594 *Journal of Plant Physiology* 2001;158:71-8.
- 595 [31] Ubi BE, Honda C, Bessho H, Kondo S, Wada M, Kobayashi S, et al. Expression analysis of  
596 anthocyanin biosynthetic genes in apple skin: Effect of UV-B and temperature. *Plant Science*  
597 2006;170:571-8.
- 598 [32] Moriguchi T, Kita M, Ogawa K, Tomono Y, Endo T, Omura M. Flavonol synthase gene expression  
599 during citrus fruit development. *Physiologia Plantarum* 2002;114:251-8.
- 600 [33] Zhang H, Wu Z, Suo Y, Wang J, Zheng L, Wang Y. Gene expression and flavonol biosynthesis are  
601 induced by ultraviolet-B and salt stresses in *Reaumuria trigyna*. *Biologia Plantarum* 2017;61:246-54.
- 602 [34] Kong Q, Qu N, Gao M, Zhang Z, Ding X, Yang F, et al. The MEKK1-MKK1/MKK2-MPK4  
603 Kinase Cascade Negatively Regulates Immunity Mediated by a Mitogen-Activated Protein Kinase  
604 Kinase Kinase in *Arabidopsis*. *The Plant Cell* 2012;24:2225-36.
- 605 [35] Lee D, Bourdais G, Yu G, Robatzek S, Coaker G. Phosphorylation of the Plant Immune Regulator  
606 RPM1-INTERACTING PROTEIN4 Enhances Plant Plasma Membrane H<sup>+</sup>-ATPase Activity and  
607 Inhibits Flagellin-Triggered Immune Responses in *Arabidopsis*. *The Plant Cell* 2015;27:2042-56.

- 608 [36] Su Q, Zheng X, Tian Y, Wang C. Exogenous Brassinolide Alleviates Salt Stress in *Malus*  
609 *hupehensis* Rehd. by Regulating the Transcription of NHX-Type Na<sup>(+)</sup>(K<sup>(+)</sup>)/H<sup>(+)</sup> Antiporters.  
610 *Frontiers in plant science* 2020;11:38.
- 611 [37] Bajguz A. An enhancing effect of exogenous brassinolide on the growth and antioxidant activity in  
612 *Chlorella vulgaris* cultures under heavy metals stress. *Environmental and Experimental Botany*  
613 2010;68:175-9.
- 614 [38] Man Ha C, Fine D, Bhatia A, Rao X, Martin MZ, Engle NL, et al. Ectopic Defense Gene  
615 Expression Is Associated with Growth Defects in *Medicago truncatula* Lignin Pathway Mutants. *Plant*  
616 *physiology* 2019;181:63-84.
- 617 [39] Emiliani J, Grotewold E, Falcone Ferreyra ML, Casati P. Flavonols Protect Arabidopsis Plants  
618 against UV-B Deleterious Effects. *Molecular Plant* 2013;6:1376-9.
- 619 [40] Muhlemann JK, Younts TLB, Muday GK. Flavonols control pollen tube growth and integrity by  
620 regulating ROS homeostasis during high-temperature stress. *Proceedings of the National Academy of*  
621 *Sciences of the United States of America* 2018;115:E11188-E97.
- 622 [41] Julkunen-Tiitto R, Nenadis N, Neugart S, Robson M, Agati G, Vepsäläinen J, et al. Assessing the  
623 response of plant flavonoids to UV radiation: an overview of appropriate techniques. *Phytochemistry*  
624 *Reviews* 2015;14:273-97.
- 625 [42] Lafuente MT, Ballester AR, Calejero J, González-Candelas L. Effect of  
626 high-temperature-conditioning treatments on quality, flavonoid composition and vitamin C of cold  
627 stored 'Fortune' mandarins. *Food Chemistry* 2011;128:1080-6.
- 628 [43] Xu P, Zhang X, Su H, Liu X, Wang Y, Hong G. Genome-wide analysis of *PYL-PP2C-SnRK2s*  
629 family in *Camellia sinensis*. *Bioengineered* 2020;11:103-15.
- 630 [44] Yang Q, Liu K, Niu X, Wang Q, Wan Y, Yang F, et al. Genome-wide Identification of *PP2C* Genes  
631 and Their Expression Profiling in Response to Drought and Cold Stresses in *Medicago truncatula*.  
632 *Scientific reports* 2018;8:12841.
- 633 [45] Marçais G, Kingsford C. A fast, lock-free approach for efficient parallel counting of occurrences of  
634 k-mers. *Bioinformatics* 2011;27:764-70.
- 635 [46] Vurture GW, Sedlazeck FJ, Nattestad M, Underwood CJ, Fang H, Gurtowski J, et al.  
636 *GenomeScope*: fast reference-free genome profiling from short reads. *Bioinformatics* 2017;33:2202-4.
- 637 [47] Vaser R, Sović I, Nagarajan N, Šikić M. Fast and accurate de novo genome assembly from long  
638 uncorrected reads. *Genome research* 2017;27:737-46.
- 639 [48] Walker BJ, Abeel T, Shea T, Priest M, Abouelliel A, Sakthikumar S, et al. Pilon: an integrated tool  
640 for comprehensive microbial variant detection and genome assembly improvement. *PLoS one*  
641 2014;9:e112963.
- 642 [49] Simão FA, Waterhouse RM, Ioannidis P, Kriventseva EV, Zdobnov EM. BUSCO: assessing  
643 genome assembly and annotation completeness with single-copy orthologs. *Bioinformatics*  
644 2015;31:3210-2.
- 645 [50] Bolger AM, Lohse M, Usadel B. Trimmomatic: a flexible trimmer for Illumina sequence data.  
646 *Bioinformatics (Oxford, England)* 2014;30:2114-20.
- 647 [51] Zhang X, Zhang S, Zhao Q, Ming R, Tang H. Assembly of allele-aware, chromosomal-scale  
648 autopolyploid genomes based on Hi-C data. *Nature Plants* 2019;5:833-45.
- 649 [52] Durand NC, Robinson JT, Shamim MS, Machol I, Mesirov JP, Lander ES, et al. Juicebox Provides  
650 a Visualization System for Hi-C Contact Maps with Unlimited Zoom. *Cell systems* 2016;3:99-101.
- 651 [53] Ou S, Jiang N. LTR\_retriever: A Highly Accurate and Sensitive Program for Identification of Long

- 652 Terminal Repeat Retrotransposons. *Plant physiology* 2018;176:1410-22.
- 653 [54] Tarailo-Graovac M, Chen N. Using RepeatMasker to Identify Repetitive Elements in Genomic  
654 Sequences. *Current Protocols in Bioinformatics* 2009;25:4.10.1-4..4.
- 655 [55] Slater GSC, Birney E. Automated generation of heuristics for biological sequence comparison.  
656 *BMC Bioinformatics* 2005;6:31.
- 657 [56] Lomsadze A, Ter-Hovhannisyan V, Chernoff YO, Borodovsky M. Gene identification in novel  
658 eukaryotic genomes by self-training algorithm. *Nucleic acids research* 2005;33:6494-506.
- 659 [57] Hoff KJ, Stanke M. Predicting Genes in Single Genomes with AUGUSTUS. *Current Protocols in*  
660 *Bioinformatics* 2019;65:e57.
- 661 [58] Kim D, Langmead B, Salzberg SL. HISAT: a fast spliced aligner with low memory requirements.  
662 *Nature Methods* 2015;12:357-60.
- 663 [59] Kovaka S, Zimin AV, Pertea GM, Razaghi R, Salzberg SL, Pertea M. Transcriptome assembly  
664 from long-read RNA-seq alignments with StringTie2. *Genome Biology* 2019;20:278.
- 665 [60] Haas BJ, Papanicolaou A, Yassour M, Grabherr M, Blood PD, Bowden J, et al. De novo transcript  
666 sequence reconstruction from RNA-seq using the Trinity platform for reference generation and  
667 analysis. *Nature protocols* 2013;8:1494-512.
- 668 [61] Haas BJ, Delcher AL, Mount SM, Wortman JR, Smith RK, Jr., Hannick LI, et al. Improving the  
669 Arabidopsis genome annotation using maximal transcript alignment assemblies. *Nucleic acids research*  
670 2003;31:5654-66.
- 671 [62] Haas BJ, Salzberg SL, Zhu W, Pertea M, Allen JE, Orvis J, et al. Automated eukaryotic gene  
672 structure annotation using EVIDENCEModeler and the Program to Assemble Spliced Alignments.  
673 *Genome Biology* 2008;9:R7.
- 674 [63] Moriya Y, Itoh M, Okuda S, Yoshizawa AC, Kanehisa M. KAAS: an automatic genome annotation  
675 and pathway reconstruction server. *Nucleic acids research* 2007;35:W182-W5.
- 676 [64] Emms DM, Kelly S. OrthoFinder: solving fundamental biases in whole genome comparisons  
677 dramatically improves orthogroup inference accuracy. *Genome Biology* 2015;16:157.
- 678 [65] Edgar RC. MUSCLE: multiple sequence alignment with high accuracy and high throughput.  
679 *Nucleic acids research* 2004;32:1792-7.
- 680 [66] Stamatakis A. RAxML version 8: a tool for phylogenetic analysis and post-analysis of large  
681 phylogenies. *Bioinformatics (Oxford, England)* 2014;30:1312-3.
- 682 [67] Li H, Durbin R. Fast and accurate long-read alignment with Burrows-Wheeler transform.  
683 *Bioinformatics (Oxford, England)* 2010;26:589-95.
- 684 [68] Li H, Handsaker B, Wysoker A, Fennell T, Ruan J, Homer N, et al. The Sequence Alignment/Map  
685 format and SAMtools. *Bioinformatics (Oxford, England)* 2009;25:2078-9.
- 686 [69] Danecek P, Auton A, Abecasis G, Albers CA, Banks E, DePristo MA, et al. The variant call format  
687 and VCFtools. *Bioinformatics (Oxford, England)* 2011;27:2156-8.
- 688 [70] Wang K, Li M, Hakonarson H. ANNOVAR: functional annotation of genetic variants from  
689 high-throughput sequencing data. *Nucleic acids research* 2010;38:e164.
- 690 [71] Kumar S, Stecher G, Tamura K. MEGA7: Molecular Evolutionary Genetics Analysis Version 7.0  
691 for Bigger Datasets. *Molecular biology and evolution* 2016;33:1870-4.
- 692 [72] Zheng X, Levine D, Shen J, Gogarten SM, Laurie C, Weir BS. A high-performance computing  
693 toolset for relatedness and principal component analysis of SNP data. *Bioinformatics (Oxford,*  
694 *England)* 2012;28:3326-8.
- 695 [73] Alexander DH, Novembre J, Lange K. Fast model-based estimation of ancestry in unrelated

696 individuals. *Genome research* 2009;19:1655-64.

697 [74] Liu S, Hansen MM. PSMC (pairwise sequentially Markovian coalescent) analysis of RAD  
698 (restriction site associated DNA) sequencing data. *Molecular Ecology Resources* 2017;17:631-41.

699 [75] Sanderson MJ. r8s: inferring absolute rates of molecular evolution and divergence times in the  
700 absence of a molecular clock. *Bioinformatics* 2003;19:301-2.

701 [76] Cheng F, Wu J, Fang L, Wang X. Syntenic gene analysis between *Brassica rapa* and other  
702 Brassicaceae species. *Front Plant Sci* 2012;3:198.

703 [77] Marcais G, Delcher AL, Phillippy AM, Coston R, Salzberg SL, Zimin A. MUMmer4: A fast  
704 and versatile genome alignment system. *PLoS Comput Biol* 2018;14:e1005944.

705 [78] Chen M, Ma Y, Wu S, Zheng X, Kang H, Sang J, et al. Genome Warehouse: A Public Repository  
706 Housing Genome-scale Data. *Genomics, Proteomics & Bioinformatics* 2021.

707 [79] Chen T, Chen X, Zhang S, Zhu J, Tang B, Wang A, et al. The Genome Sequence Archive Family:  
708 Toward Explosive Data Growth and Diverse Data Types. *Genomics, Proteomics & Bioinformatics*  
709 2021.

710 [80] Members C-N, Partners. Database Resources of the National Genomics Data Center, China  
711 National Center for Bioinformation in 2021. *Nucleic acids research* 2021;49:D18-D28.

712

713



714 **Tables**

715

716 **Table 1** Assembly and annotation statistics of the Shanmei genome

| <b>Type</b>           | <b>Contig</b>    |               | <b>Scaffold</b>  |               |
|-----------------------|------------------|---------------|------------------|---------------|
|                       | <b>Size (Mb)</b> | <b>Number</b> | <b>Size (Mb)</b> | <b>Number</b> |
| Maximum               | 11.08            | 1             | 36.68            | 1             |
| N50                   | 3.34             | 21            | 29.50            | 4             |
| N90                   | 0.78             | 80            | 27.00            | 6             |
| Total length          | 215.69           | 120           | 215.74           | 10            |
| Chromosomes           | /                | /             | 214.29 (99.35%)  |               |
| Genes                 | /                | /             | /                | 26,696        |
| Transposable elements | /                | /             | 77.33 (35.85%)   | /             |

717

718

719 **Figure Legends**

720

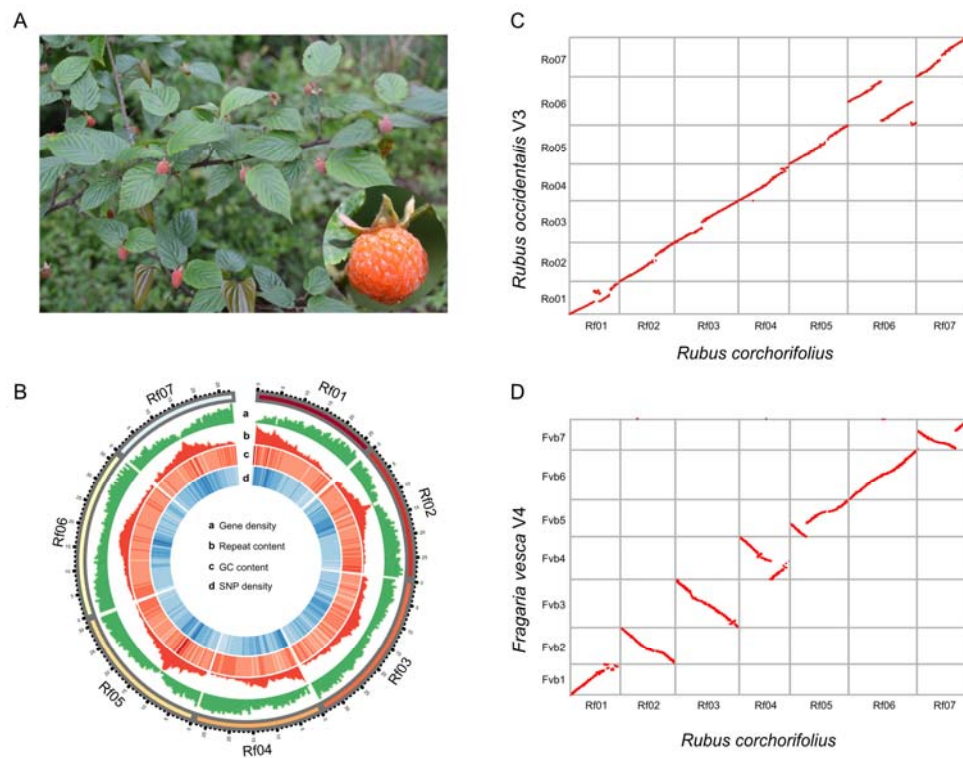

721

722 **Figure 1 Assembly and characterization of the Shanmei genome**

723 **A.** The Shanmei plant and the close-up view of its fruit. **B.** The landscape of the  
724 Shanmei genome. a: gene density; b: repeat content; c: GC content; and d: SNP  
725 density. The chromosome units are in 1 Mb. **C.** Genomic synteny between Shanmei  
726 and blackberry. **D.** Genomic synteny between Shanmei and strawberry. *Rubus*  
727 *corchorifolius*, Shanmei; *Rubus occidentalis*, blackberry; *Fragaria vesca*, strawberry.

728

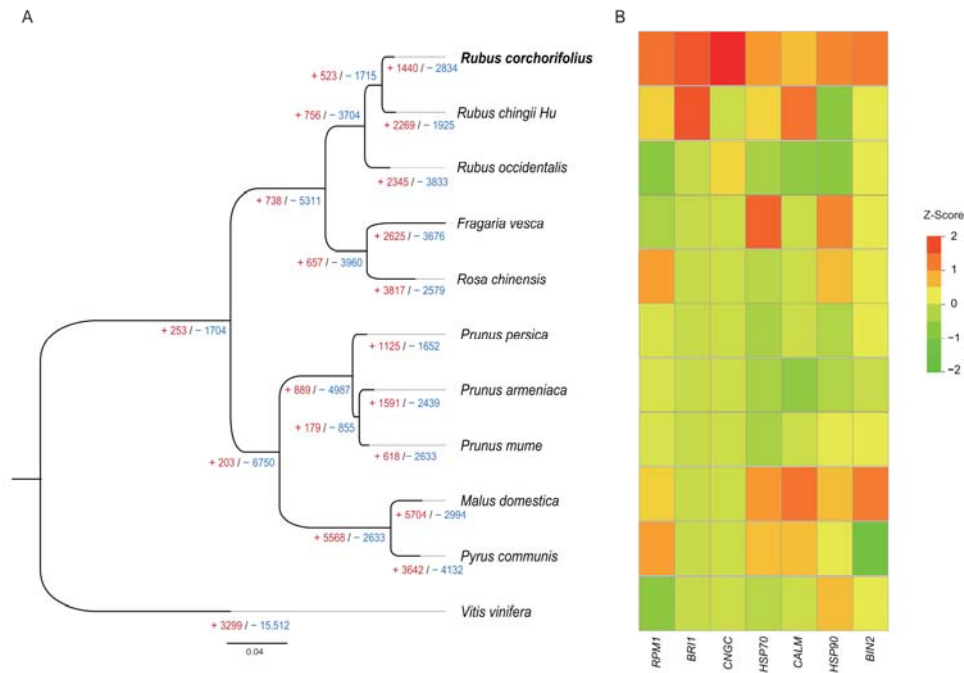

729

730 **Figure 2 Phylogenetic position and gene family expansion of Shanmei**

731 **A.** The phylogenetic tree of Shanmei and eight other Rosaceae species built based on  
732 897 single-copy genes, with *Vitis vinifera* as the outgroup. The inferred expansion  
733 (red numbers) and contraction (blue numbers) of gene families in different genomes  
734 are indicated. **B.** Copy number variations of the gene family associated with  
735 environmental adaptation.

736

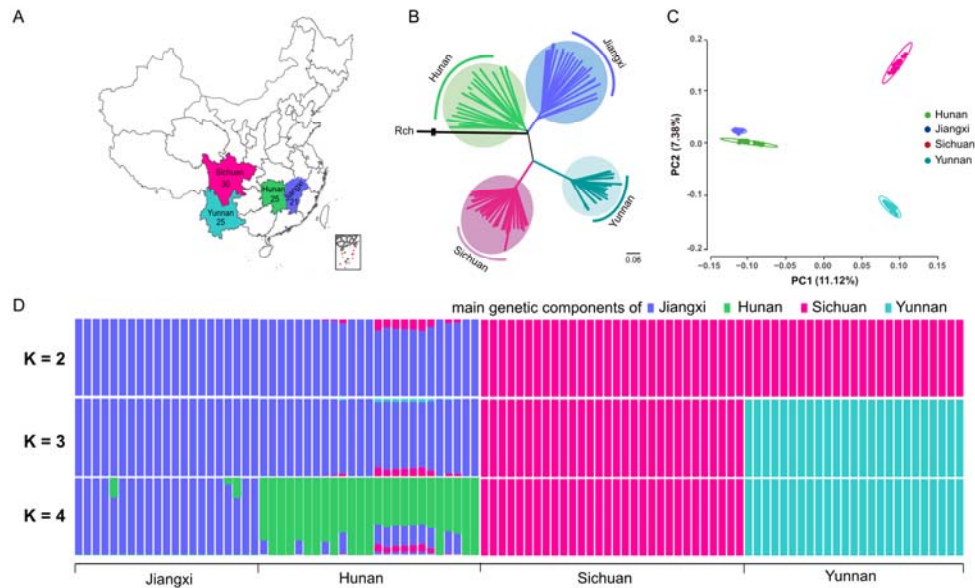

737

### 738 **Figure 3 Population structure of Shanmei**

739 **A.** The geographic locations sampled in this study. The numbers denote the number of  
740 samples collected in the corresponding region. **B.** Best maximum-likelihood tree  
741 showing the phylogenetic relationships of the 101 Shanmei samples. The genome of  
742 Fupenzi (Rch) was used as the outgroup. **C.** Principal component analysis of the  
743 Shanmei populations. PC1 and PC2 split populations into four clusters. **D.** Genetic  
744 admixture of the Shanmei samples analyzed. The length of each colored segment  
745 represents the proportion of genetic components in each sample ( $K = 2-4$ ). Blue,  
746 green, pink, and cyan represent the main genetic components of Jiangxi, Hunan,  
747 Sichuan, and Yunnan Shanmei groups, respectively.

748

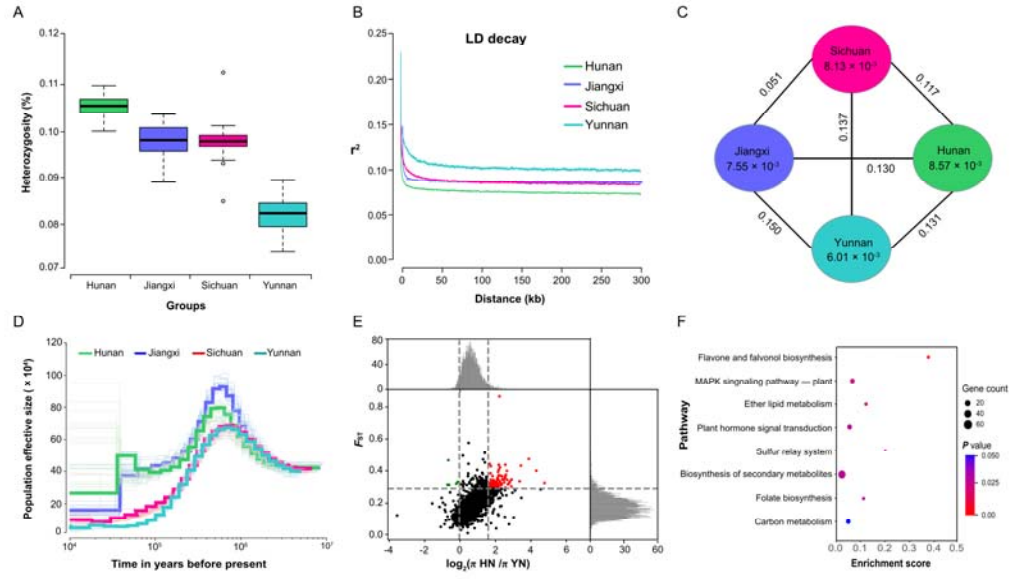

749

750 **Figure 4 Nucleotide diversity and population divergence of the 101 Shanmei**  
751 **samples**

752 **A.** Genomic heterozygosity of the Hunan, Jiangxi, Sichuan, and Yunnan Shanmei  
753 groups. **B.** Decay of LD in four groups of Shanmei. **C.** Nucleotide diversity ( $\pi$ ) and  
754 population divergence ( $F_{ST}$ ) among the four Shanmei groups. Values between pairs  
755 indicate population divergence, and values in each circle represent the nucleotide  
756 diversity ( $\pi$ ) for corresponding group. **D.** Historical effective population size of four  
757 Shanmei groups. **E.** Distribution of population differentiation ( $F_{ST}$ ) and  $\pi$  ratio ( $\log_2(\pi$   
758  $HN/\pi_{YN})$ ) between the Hunan and Yunnan groups.  $F_{ST}$  and  $\pi$  values were calculated  
759 across the Shanmei genome using a 50-kb sliding window. **F.** Functional enrichment  
760 of genes located at genomic regions under selection in the Yunnan group. LD, linkage  
761 disequilibrium;

762

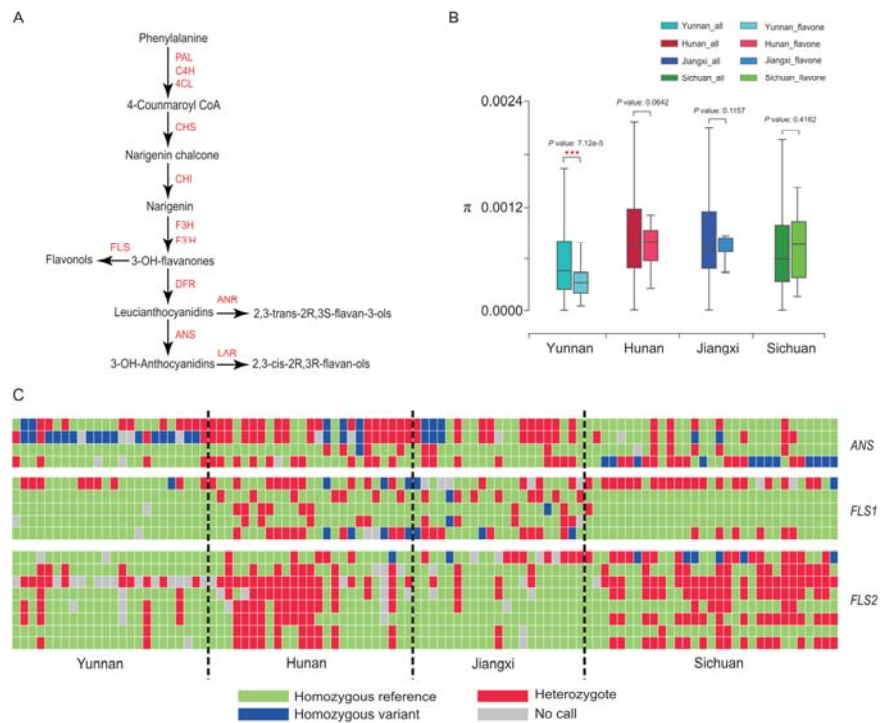

763

764 **Figure 5 Variations in flavonoid-related genes in the four groups of Shanmei**  
 765 **population**

766 **A.** Schematic of the anthocyanin biosynthetic pathway. **B.** Nucleotide diversity ( $\pi$ )  
 767 comparisons between flavonoid biosynthesis genes and all the genes in the genome of  
 768 Shanmei for each of the four Shanmei groups. **C.** Genotype variations at  
 769 non-synonymous SNPs in genes involved in the biosynthesis of flavonoids. *ANS*,  
 770 Anthocyanidin Synthase; *FLS1*, Flavonol Synthase copy1; *FLS2*, Flavonol Synthase  
 771 copy 2.

772

773

774 **Supplementary Materials**

775

776 **Supplementary Tables 1-12:**

777 **Supplementary Table S1** The statistics of sequencing data used for the Shanmei  
778 genome assembly

779 **Supplementary Table S2** The length and the number of contigs in each  
780 chromosome of Shanmei

781 **Supplementary Table S3** The statistics of genes in each prediction process

782 **Supplementary Table S4** The statistics of different groups of transposable  
783 elements in the genome of Shanmei

784 **Supplementary Table S5** The KEGG enrichment analysis of expanded genes in  
785 the genome of Shanmei

786 **Supplementary Table S6** The KEGG enrichment analysis of contracted genes  
787 in the genome of Shanmei

788 **Supplementary Table S7** Function annotation of expanded genes in Shanmei

789 **Supplementary Table S8** Identification of key genes in anthocyanin  
790 biosynthesis

791 **Supplementary Table S9** Copy number variation of key genes for lignin  
792 biosynthesis in Rosaceae

793 **Supplementary Table S10** Resequencing data statistics for the 101 Shanmei  
794 samples

795 **Supplementary Table S11** Distribution of SNPs in each chromosome of  
796 Shanmei

797 **Supplementary Table S12** The heterozygosity ratio of each resequenced  
798 Shanmei sample

799

800 **Supplementary Figures 1-14:**

801 **Supplementary Figure S1** The genome size of Shanmei estimated by  
802 GenomeScope

803 **Supplementary Figure S2** Whole genome Hi-C contacts of Shanmei

804 The black triangles represent the positions of telomere sequences in the seven  
805 chromosomes of Shanmei.

806 **Supplementary Figure S3** Genome synteny analysis of Shanmei, blackberry,  
807 and strawberry by MCscanX

808 The numbers indicate the chromosome order. The line represents a one-to-one  
809 correspondence of homologous regions between genomes of Shanmei and blackberry  
810 or strawberry. *Rubus occidentalis*, blackberry; *Rubus corchorifolius*, Shanmei;  
811 *Fragaria vesca*, strawberry.

812 **Supplementary Figure S4 Verification of the segmental translocation in**  
813 **chromosome 6 between Shanmei and blackberry using the information of Hi-C**  
814 **contacts**

815 **A.** The synteny of chromosome 6 between Shanmei and blackberry. The X-axis  
816 denotes the chromosome 6 of blackberry (Ro06). The Y-axis denotes the chromosome  
817 6 of Shanmei (Rf06). **B.** The Hi-C heatmap of Shanmei Rf06. **C.** The synteny of  
818 chromosome 6 between Shanmei and blackberry after the re-ordering of Shanmei  
819 Rf06 following that of blackberry Ro06. **D.** The Hi-C heatmap of Shanmei Rf06 after  
820 re-ordering. There are obvious incorrect Hi-C contacts in the re-ordered Rf06 of  
821 Shanmei.

822 **Supplementary Figure S5 Genomic synteny between Shanmei and Fupenzi**

823 *Rubus corchorifolius*, Shanmei; *Rubus chingii* Hu, Fupenzi.

824 **Supplementary Figure S6 Verification of the inversions in chromosome 1**  
825 **between Shanmei and Fupenzi using the information of Hi-C contacts**

826 **A.** The synteny of chromosome 1 between Shanmei and Fupenzi. The X-axis denotes  
827 the chromosome 1 of Fupenzi (LG01). The Y-axis denotes the chromosome 1 of  
828 Shanmei (Rf01). **B.** The Hi-C heatmap of Shanmei Rf01. **C.** The synteny of  
829 chromosome 1 between Shanmei and Fupenzi after the re-ordering of Shanmei Rf01  
830 following that of Fupenzi LG01. **D.** The Hi-C heatmap of Shanmei Rf01 after  
831 re-ordering.

832 **Supplementary Figure S7 Verification of the inversion in chromosome 4**  
833 **between Shanmei and Fupenzi using information of Hi-C contacts**

834 **A.** The synteny of chromosome 4 between Shanmei and Fupenzi. The X-axis denotes  
835 the chromosome 4 of Fupenzi (LG04). The Y-axis denotes the chromosome 4 of  
836 Shanmei (Rf04). **B.** The Hi-C heatmap of Shanmei Rf04. **C.** The synteny of  
837 chromosome 4 between Shanmei and Fupenzi after the re-ordering of Shanmei Rf04  
838 following that of Fupenzi LG04. **D.** The Hi-C heatmap of Shanmei Rf04 after  
839 re-ordering.

840 **Supplementary Figure S8 KEGG enrichment analysis of genes sets in Shanmei**

841 **A.** KEGG enrichment for expanded genes. **B.** KEGG enrichment for contracted genes.

842 **Supplementary Figure S9 Variations on copy number and expression of key**  
843 **genes involved in lignin biosynthesis in Rosaceae**

844 **A.** The genes reported in the biosynthesis pathway of lignin. **B.** Heatmap of the copy  
845 number of key genes for lignin biosynthesis in Rosaceae. **C.** Phylogenetic tree of the



846 COMT gene family. **D.** The genes' expression level (TPM: transcripts per million  
847 mapped reads) measured by mRNA-seq data of stem organ from three representative  
848 species of macrophanerophytes, shrub, and herb. Rf, Shanmei; Fv, strawberry; Pp,  
849 peach; Pyc, pear; At, Arabidopsis.

850 **Supplementary Figure S10 Characterization of MYB10 in Rosaceae species**

851 **A.** Protein sequence alignment of the MYB10 transcription factors, showing only the  
852 part of R2 and R3 domains. Conserved tryptophan residues in the R2 and R3 domains  
853 were marked with asterisks (\*). The characteristic amino acids in the  
854 dicot anthocyanin-promoting MYB transcription factors were highlighted by red  
855 boxes. **B.** The RuMYB10 protein 3D structure. The arrow pointed at the Asparagine  
856 (N). *Rubus occidentalis*, blackberry; *Rubus corchorifolius*, Shanmei; *Rubus idaeus*,  
857 red raspberry; *Fragaria vesca*, strawberry; *Prunus dulcis*, Almod; *Prunus persica*,  
858 peach; *Pyrus avium*, Sweet cherry; *Pyrus communis*, pear; *Pyrus pyrifolia*, sand pear;  
859 *Malus domestica*, apple.

860 **Supplementary Figure S11 Standard error estimation of Shanmei population**  
861 **admixture analysis**

862 **Supplementary Figure S12 KEGG enrichment analysis of genes located at**  
863 **genomic regions under selection in Shanmei Yunnan group comparing to that of**  
864 **Hunan group**

865 **Supplementary Figure S13 KEGG enrichment analysis of genes located at**  
866 **genomic regions under selection in Shanmei Yunnan group comparing to that of**  
867 **Jiangxi group**

868 **Supplementary Figure S14 KEGG enrichment analysis of genes located at**  
869 **genomic regions under selection in Shanmei Yunnan group comparing to that of**  
870 **Sichuan group**

871
